# Supplementary material for: A birefringent spectral demultiplexer enables fast hyper-spectral imaging of protoporphyrin IX during neurosurgery
Source: PubMed Central journal article supplement (PMC10060426; doi:10.1038/s42003-023-04701-9), 2023-03-30
Supplement: 42003_2023_4701_MOESM1_ESM.pdf [file 42003_2023_4701_MOESM1_ESM.pdf]

Supplemental Figure 1

**Title:** Scaled Reference Target Image From LCTF System

**Caption:** Reference Target Image from LCTF system used to determine its spatial resolution. Image is compressed (windowed and leveled) for improved visualization.

Supplemental Figure 2

**Title:** Scaled Reference Target Image From IRIS System

**Caption:** Reference Target Image from IRIS system used to determine its spatial resolution. Image is compressed (windowed and leveled) for improved visualization.

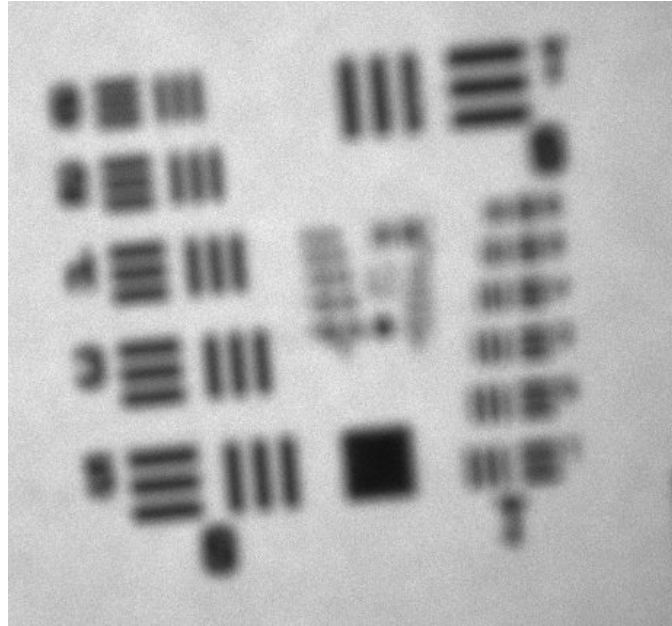

Supplemental Figure 1

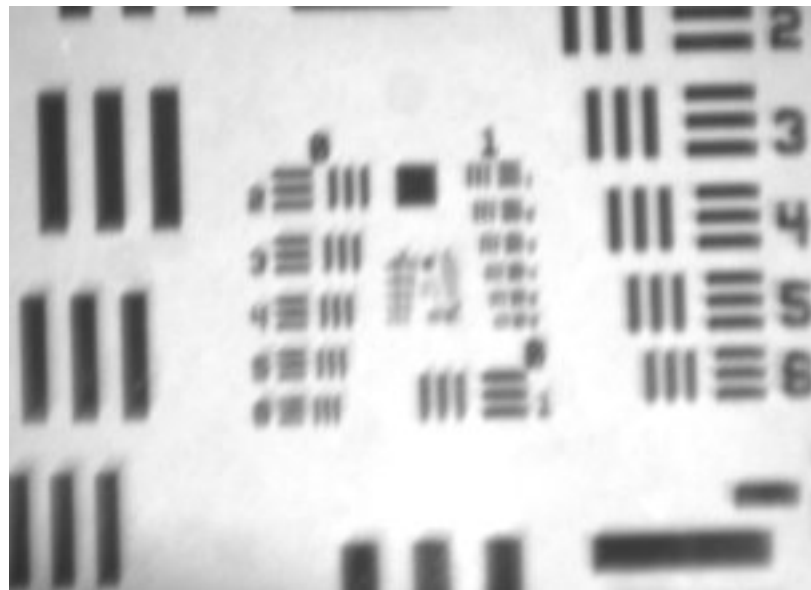

Supplemental Figure 2
