# Supplementary material for: A birefringent spectral demultiplexer enables fast hyper-spectral imaging of protoporphyrin IX during neurosurgery
Source: PubMed Central journal article supplement (PMC10060426; doi:10.1038/s42003-023-04701-9), 2023-03-30
Supplement: 42003_2023_4701_MOESM2_ESM.pdf [file 42003_2023_4701_MOESM2_ESM.pdf]

## Description of Additional Supplementary Files

**File Name:** Supplementary Data 1

**Description:** The source data behind graph is Figure 2.

**File Name:** Supplementary Data 2

**Description:** The source data behind the graph in Figure 3.

**File Name:** Supplementary Data 3

**Description:** Zip folder of source image data of reference target for spatial resolution determinations of IRIS and LCTF imaging system including original 16-bit data and windowed versions for visualization for each imaging system.
